# Supplementary material
Source: PubMed Central journal article supplement (PMC4594592)
Supplement: kogg-10-04-1011921-s001.pdf [file kogg-10-04-1011921-s001.pdf]

**Hoechst**

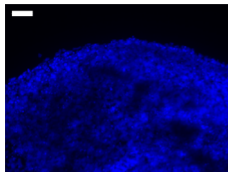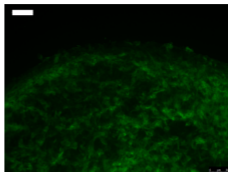

**MUSASHI**

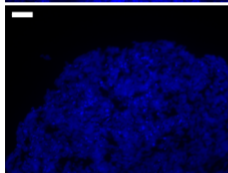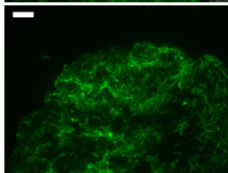

**NESTIN**

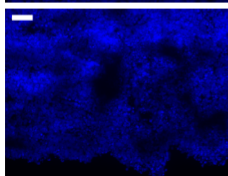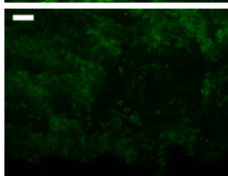

**SOX1**

Immunocytochemical analysis of NLSs. Scale bar is 50  $\mu$ m.

**Supplementary Figure 1**
